# Supplementary material
Source: PubMed Central journal article supplement (PMC3572335)

### A) HO-1<sup>+/+</sup> MSCs

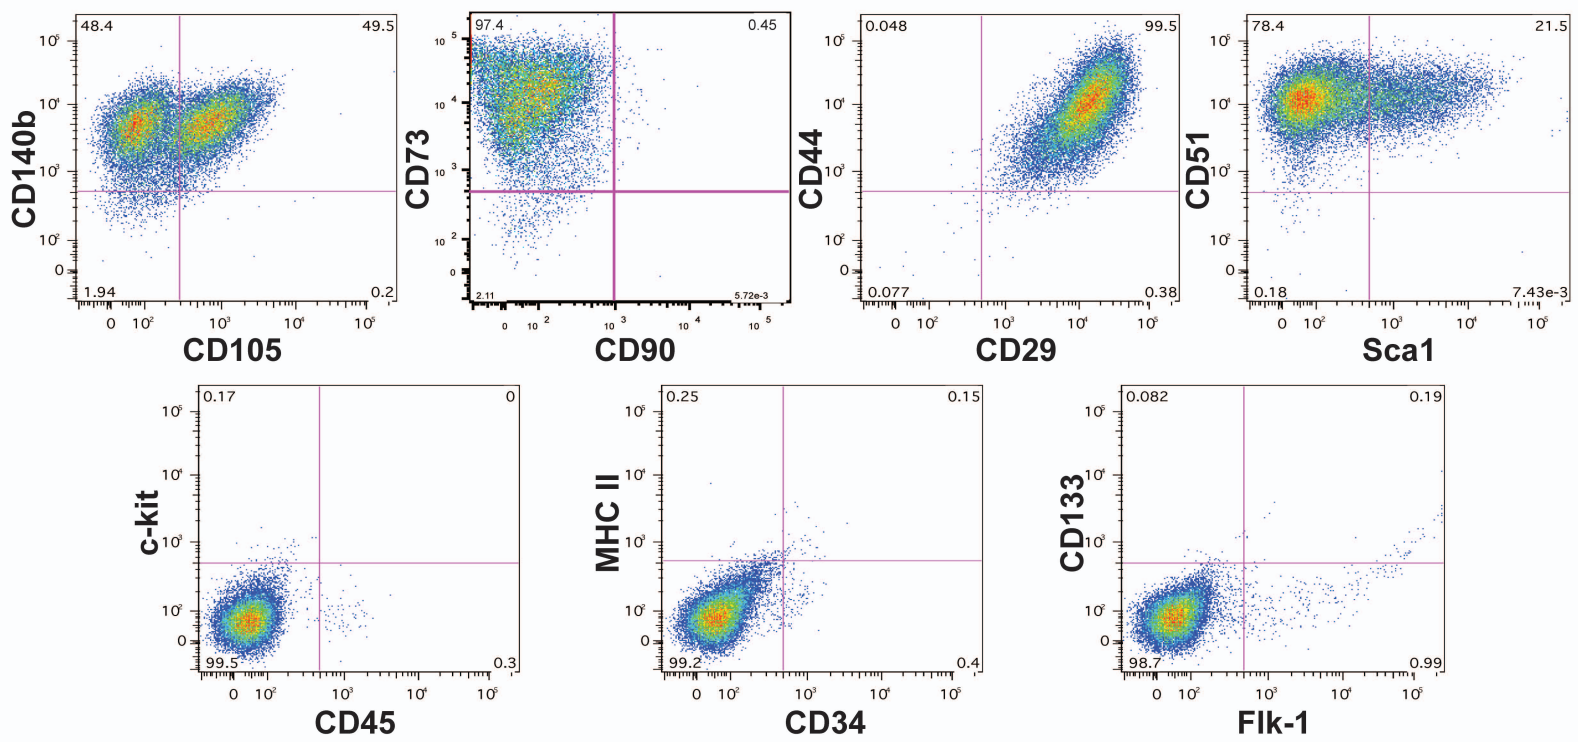

### B) HO-1<sup>-/-</sup> MSCs

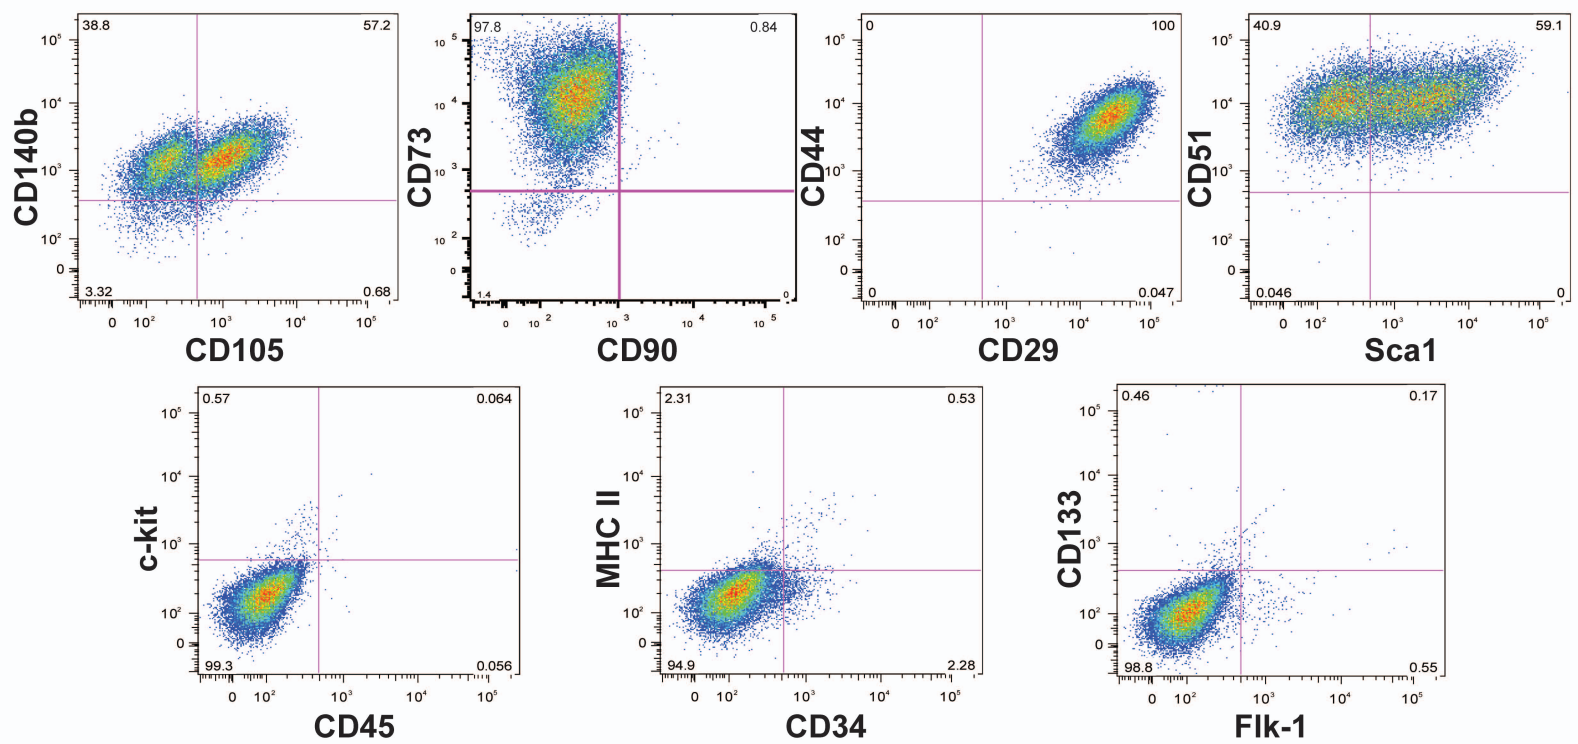

### C) Differentiation of MSCs

osteoblasts

adipocytes

chondrocytes

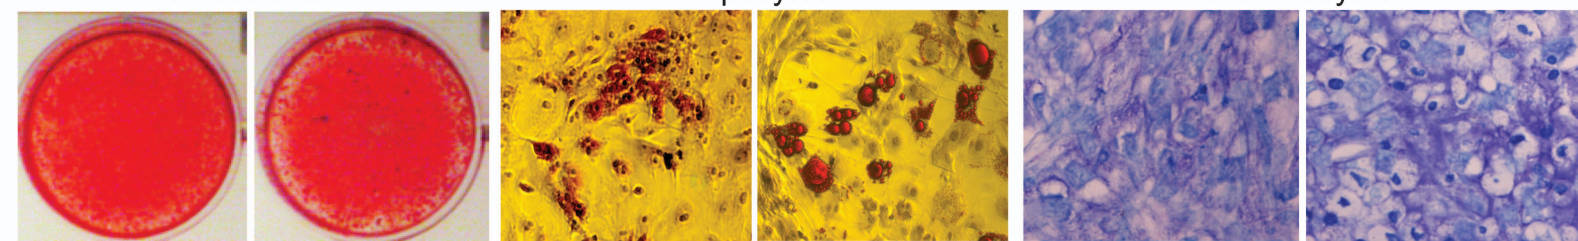

+/+

-/-

+/+

-/-

+/+

-/-

HO-1<sup>+/+</sup>HO-1<sup>-/-</sup>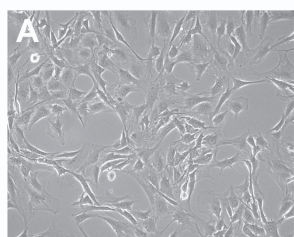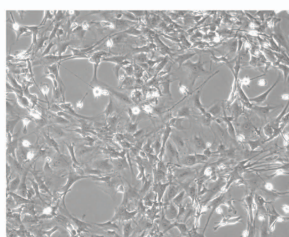**C**

+/+    -/-

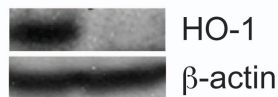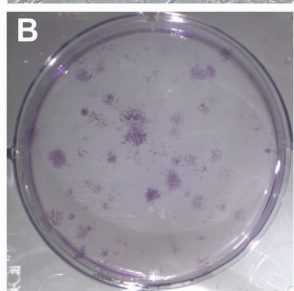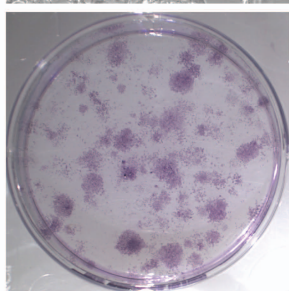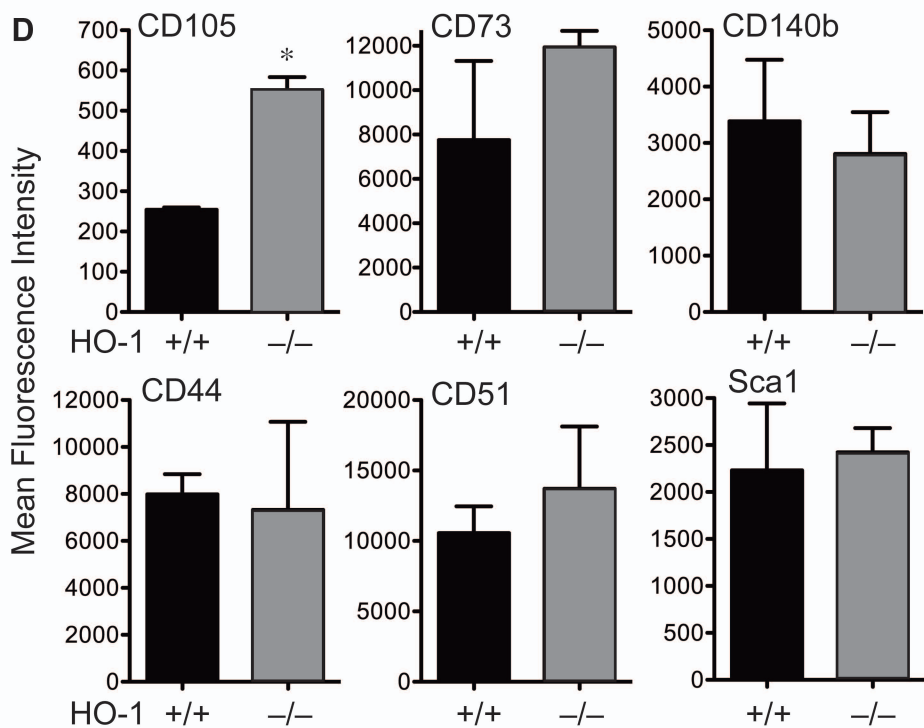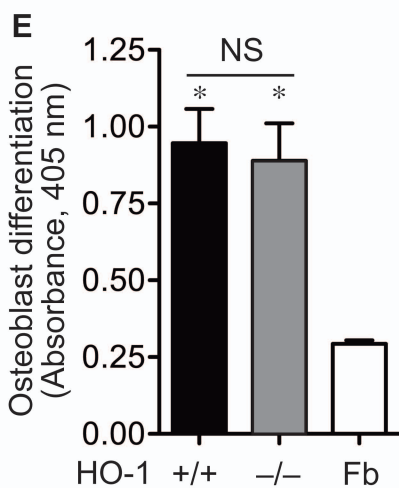

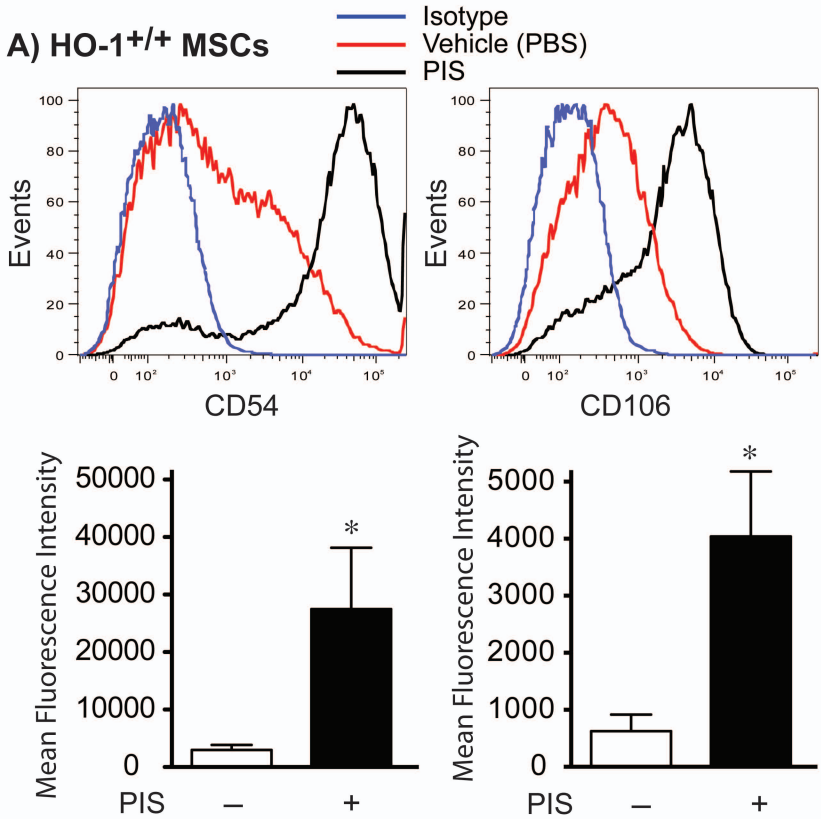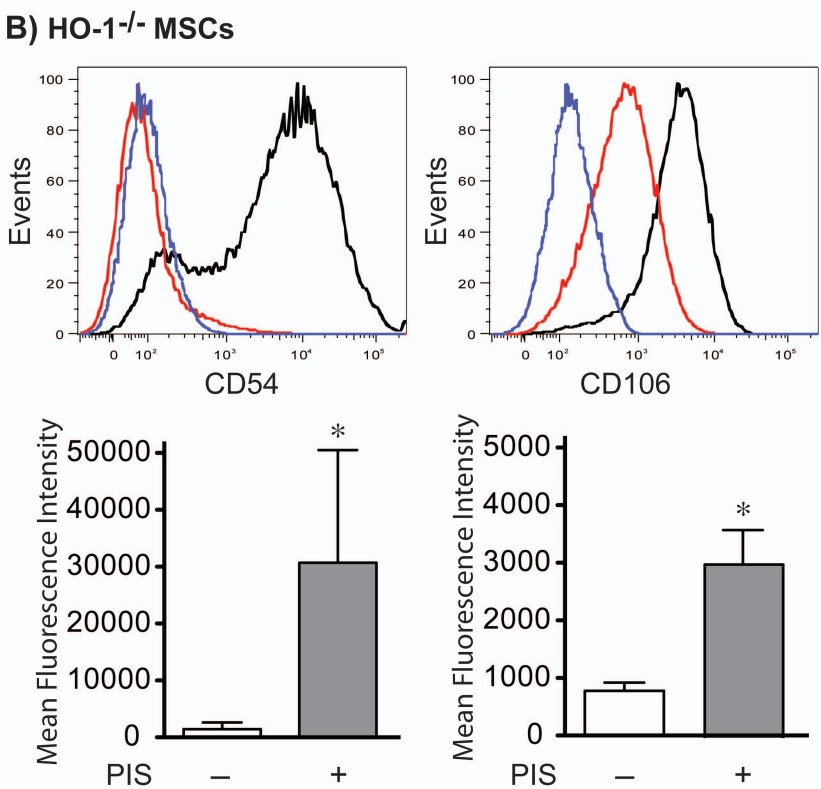

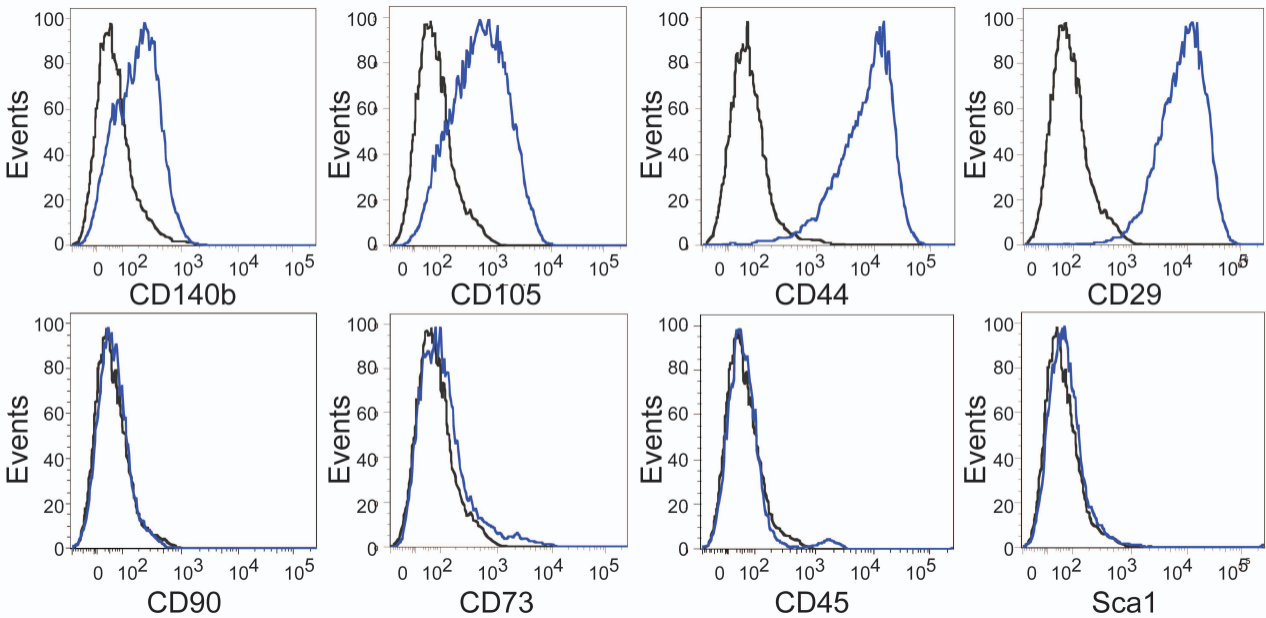

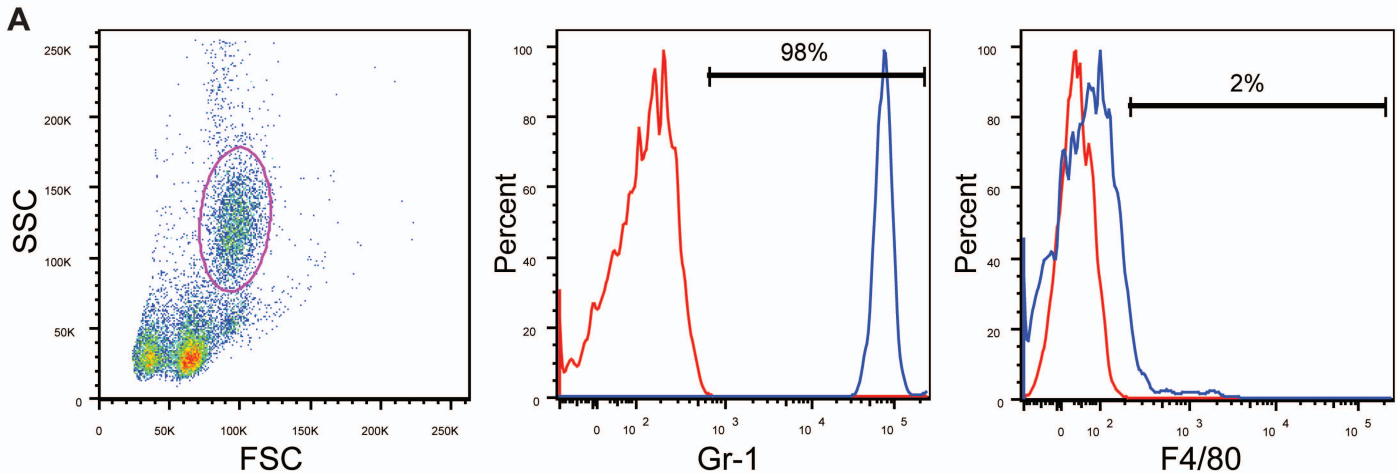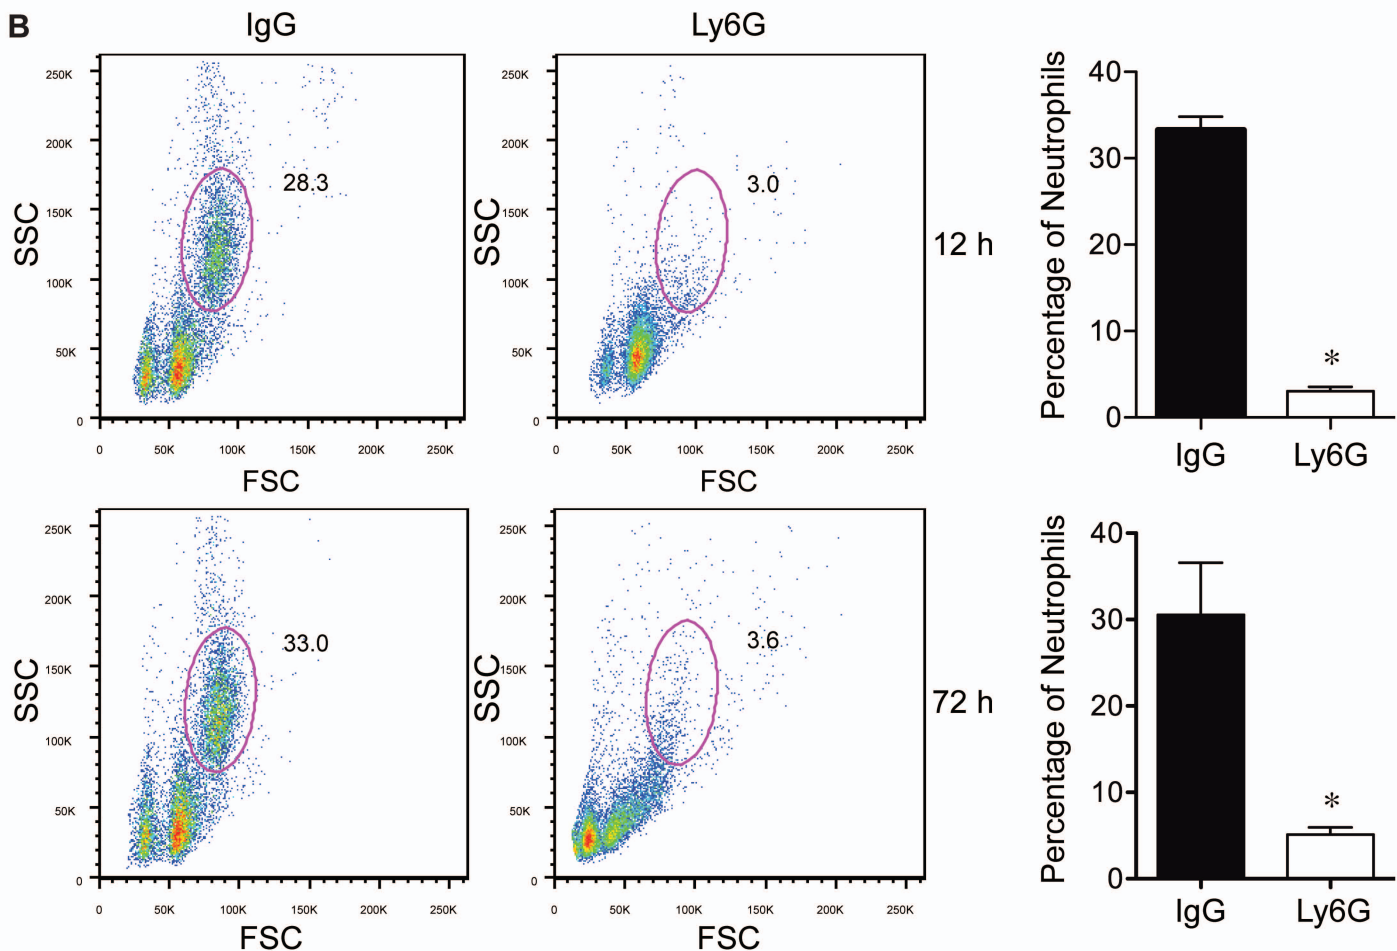

**A****- MSC**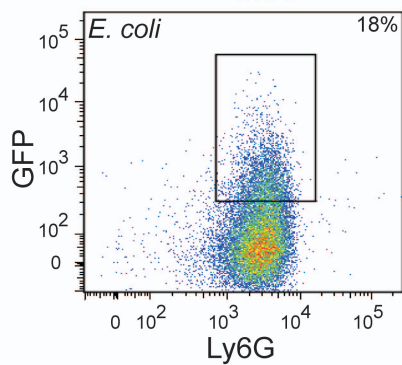**+ HO-1<sup>-/-</sup> MSC**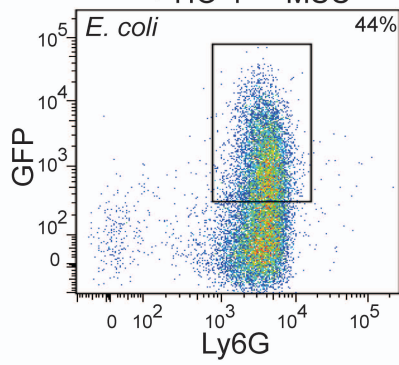**+ HO-1<sup>+/+</sup> MSC**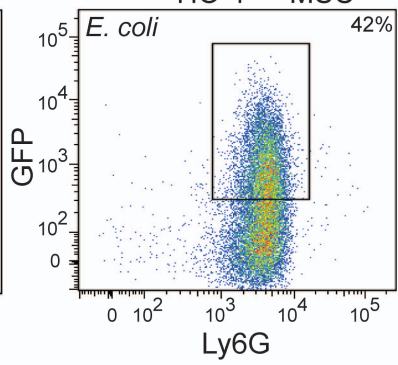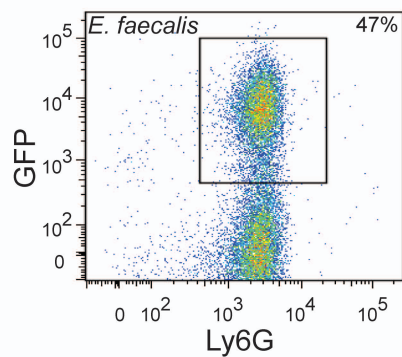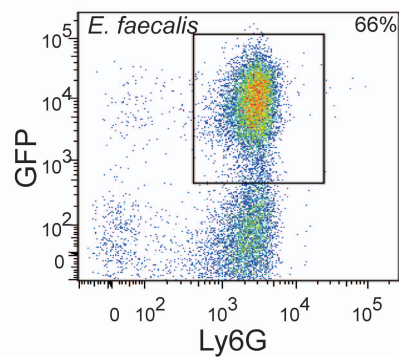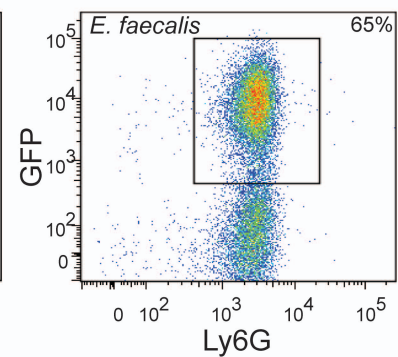**B****HO-1<sup>-/-</sup> MSC**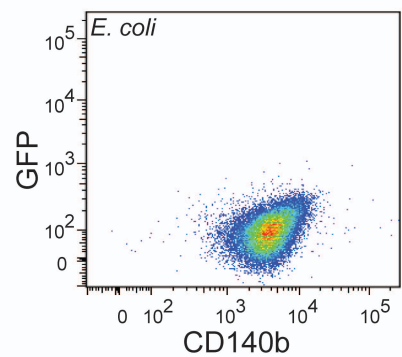**HO-1<sup>+/+</sup> MSC**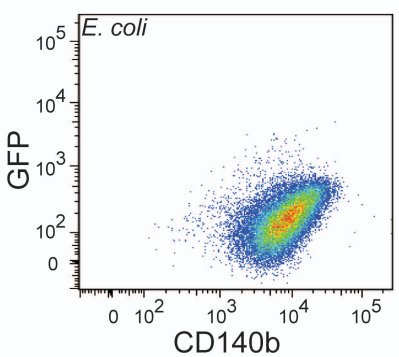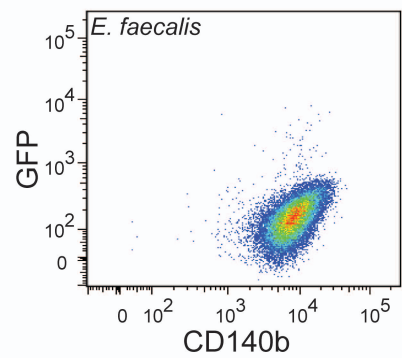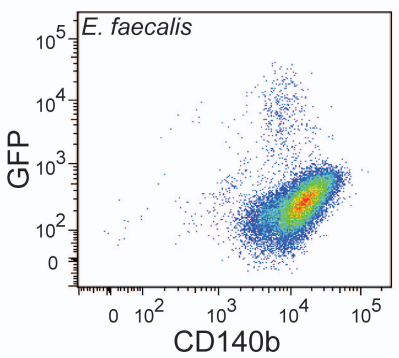

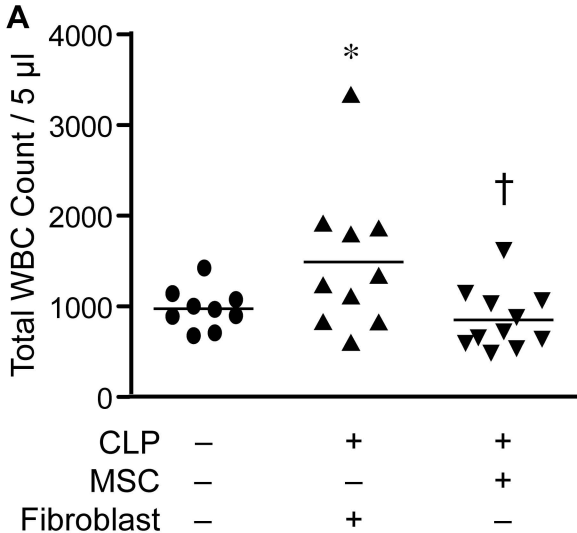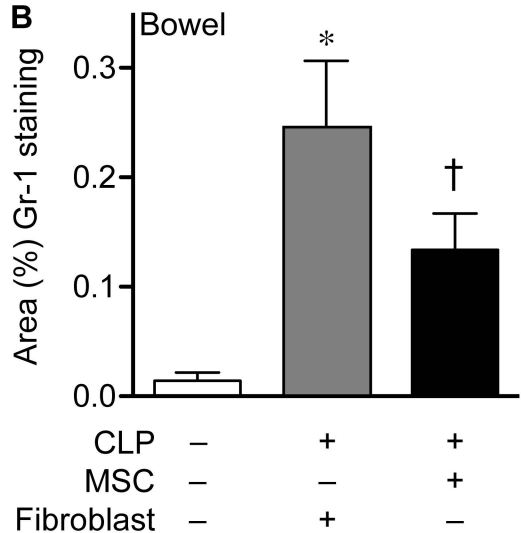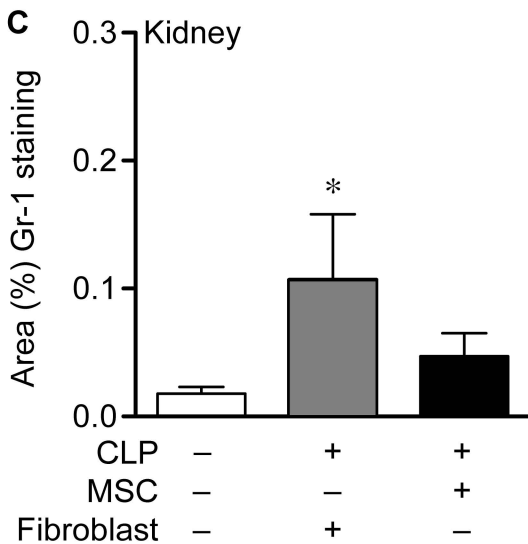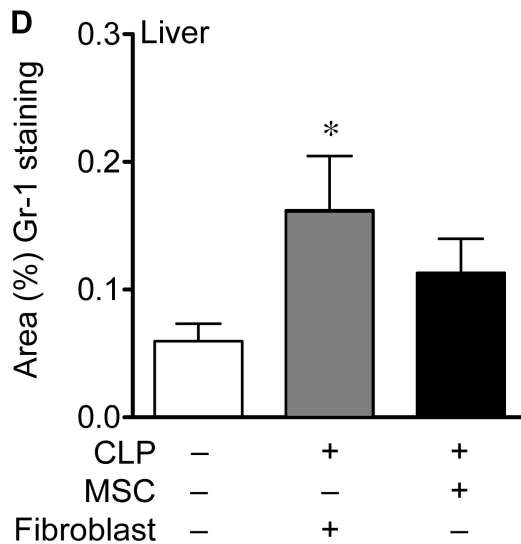

Supplement: NIHMS419468-supplement-Supp_Figure_S1-S7.pdf [file NIHMS419468-supplement-Supp_Figure_S1-S7.pdf]
